# Supplementary material for: Mice modulate ultrasonic calling bouts according to sociosexual context
Source: R Soc Open Sci. 2018 Jun 20;5(6):180378. doi: 10.1098/rsos.180378 (PMC6030292; doi:10.1098/rsos.180378)
Supplement: Call parameter [file rsos180378supp1.xlsx]

## Sheet: paper details
Journal	Royal Society Open Science
File name	Supplementary Information 1: Call parameter in each context
Article title	Mice modulate ultrasonic calling bouts according to sociosexual context
Authors	Yui K. Matsumoto and Kazuo Okanoya

## Sheet: call parameter
	number of animals			mean duration (s)			RMS			peak frequency (Hz)			bandwidth (Hz)			peak frequency start (Hz)			peak frequency center (Hz)			peak frequency end (Hz)
	MM	MF	FF	MM	MF	FF	MM	MF	FF	MM	MF	FF	MM	MF	FF	MM	MF	FF	MM	MF	FF	MM	MF	FF
Up	11	11	10	0.019±0.0016	0.02±0.0017	0.016±0.0016	-35.65±0.9	-36.85±0.87	-33.16±0.97	78344.58273±2660.20579	75552.07727±1449.91895	78018.395±1318.2987	2982.15909±165.92505	2787.79527±157.47967	2827.8643±107.052	74050.85909±2591.75815	71597.20636±1480.59193	74825.712±1828.35726	84238.42091±3013.84463	75195.82909±1629.84138	77440.759±1501.21322	77151.91636±2752.67259	83502.58273±1760.7572	83770.18±2242.18248
OJs	11	11	10	0.028±0.0015	0.03±0.0025	0.028±0.001	-34.73±1	-34.78±1.4	-31.19±1	75212.72091±2637.4167	73065.90455±1299.79682	73884.726±1521.91214	2424.88164±127.7626	2363.68664±118.68952	2197.9894±73.0131	75665.33273±2608.81804	75116.59636±1905.45907	78051.232±1579.17113	75217.45636±1721.84584	73695.23455±1463.44474	72056.682±1723.1772	74966.35091±3366.87978	71044.84±1320.60378	74167.397±1698.77121
MJs	10	11	10	0.046±0.0025	0.05±0.003	0.055±0.0018	-33.86±1.1	-33.93±1.3	-29.59±1.1	74251.107±3624.01373	72185.05273±1737.65881	71493.105±1663.22758	2013.2515±60.80136	2021.24309±108.24729	1820.502±33.18589	73227.167±2001.87135	75554.38±1470.88826	76248.282±1781.64134	77677.971±2318.21372	70595.28364±3818.02608	72723.852±1738.27544	72596.497±5184.21713	73406.25455±1700.64958	73755.078±1313.39928
Dn	11	11	10	0.017±0.0019	0.024±0.0024	0.021±0.0014	-36.64±0.89	-36.88±0.75	-33.24±0.98	78608.61727±3079.82019	74155.85818±1765.33383	76024.728±1231.61583	3054.60027±224.40839	2780.89036±183.83997	2743.3089±91.86029	82385.83±3643.9661	81784.73909±2310.32183	81508.631±2089.21674	78466.76727±2765.99256	73779.89455±2095.39659	75831.673±1389.36362	80126.95±3269.0449	71510.68273±2014.51746	74252.445±1500.57584
F	11	11	10	0.015±0.0016	0.019±0.0021	0.017±0.0028	-36.49±0.85	-37.44±0.81	-33.67±0.98	76708.76636±2795.24666	71817.24364±1792.10395	70448.723±1265.32762	2766.915±129.94635	2687.88627±134.37139	2486.4928±153.4377	79183.09±2437.72731	73902.08727±1448.7449	71557.088±1662.68426	77939.98±3355.82942	69578.16545±2880.52019	69463.465±1109.46031	74813.06636±3827.35698	75390.66727±2668.98879	72814.567±1351.75105
Cv	10	11	10	0.045±0.0056	0.045±0.0041	0.039±0.0052	-33.97±0.98	-35.12±1	-30.7±1.5	84602.302±3332.24153	77217.22455±1907.58723	78766.17±1074.02211	2176.0634±104.66811	2228.40164±141.58869	2193.2805±120.18125	75306.225±2910.31259	70909.78±2461.54495	74772.407±2254.45241	81247.37±3551.93919	80375.85±1765.75452	79487.287±3930.04179	91774.495±3976.83372	72514.74455±2518.37006	76536.454±1793.33506
U	11	11	10	0.028±0.0021	0.033±0.0012	0.038±0.0014	-35.24±0.69	-36.05±1	-31.7±1.4	75322.91091±2248.28324	72133.64818±1665.00046	77117.891±2322.84829	2395.18545±139.07127	2279.13764±89.68101	2103.8349±66.22299	76292.15364±2179.89184	79992.32364±3004.96461	83654.895±2278.40117	80834.56091±2397.15696	64504.39091±3688.27556	74316.298±2153.84859	74025.00182±3186.56564	80771.04818±2359.05615	80842.026±2165.1856
W	11	11	10	0.053±0.0065	0.062±0.0041	0.063±0.0037	-34.09±1.3	-34.35±1.3	-28.93±1.5	76837.70364±3312.85831	74407.92727±1467.93492	75642.84±1968.20719	2131.88545±161.50623	2013.09073±87.91884	1843.7995±98.25813	78960.40909±2828.35926	72034.36±3102.83803	80674.594±3848.997	80443.18±2724.20098	75454.22545±1921.47825	72848.042±2442.34504	71255.26182±5014.54389	74426.27545±2799.5939	77144.882±2811.31157
Cp	9	10	10	0.096±0.0095	0.12±0.0056	0.11±0.0061	-32.13±1.6	-31.4±1.5	-28.39±1.7	76385.11778±3693.1078	75541.822±2113.80195	72538.675±2275.65106	1796.77533±100.26368	1770.1046±69.49247	1716.2558±85.88848	77296.74111±3598.58918	73478.688±1901.43047	75259.354±4078.36837	77992.64889±2960.61318	77776.186±2644.08683	72843.654±2039.44107	79417.94778±4190.41005	68891.302±2258.6458	68546.795±2155.69692
OJl	10	11	9	0.1±0.0056	0.11±0.0053	0.11±0.0043	-30.34±1.2	-30.26±1.9	-25.55±1.1	75281.228±2172.73756	72447.77364±1894.78368	69034.35±1470.74676	1648.8407±51.01458	1717.89055±41.35414	1612.06189±17.25629	75088.802±2365.17281	78641.91818±3727.36134	74671.56889±1678.2488	66312.254±3026.65861	70761.99182±4115.33602	68760.41333±1845.99039	73283.206±1933.3918	59635.15727±2314.494	64282.66444±2333.33525
MJl	10	11	9	0.12±0.0051	0.14±0.0078	0.14±0.0028	-31.14±1.2	-30.71±1.6	-25.84±1.1	76489.512±3141.66446	71737.82091±1979.51438	68128.57111±1461.85374	1709.2264±41.93828	1642.724±23.02856	1562.32344±22.85755	74340.165±2341.18933	75587.29455±1674.90158	73671.18111±1737.03183	73531.223±3126.92534	73267.44727±2398.22951	67906.48111±1464.92261	77731.678±2833.30047	65691.61455±1870.02826	65696.49444±1496.26861
H	8	10	10	0.11±0.012	0.17±0.017	0.15±0.0047	-26.25±1.5	-27.75±2.1	-24.42±1.8	74811.915±2232.29123	72105.587±2234.69665	65799.408±2423.24521	1862.87263±75.42956	1848.1749±128.06189	1605.1264±32.29392	67854.5±4880.93434	73711.259±1988.61158	77444.411±6511.54868	74781.10125±3536.20588	70115.11±2847.46287	67361.09±6179.74192	73899.03875±2580.12303	64630.459±2505.09845	62915.78±2781.68202
